# Supplementary material for: AGAPduplicons associate with structural diversity at Chromosome 10q11.22
Source: HighWire-hosted journal article supplement (doi:10.1101/gr.279454.124), 2024-09-25
Supplement: Supplemental_Figures.pdf [file Supplemental_Figures.pdf]

## ***AGAP* duplicons associate with structural diversity at Chromosome 10q11.22**

Stefania Fornezza<sup>1,4</sup>, Vincenza Simona Delvecchio<sup>1,4</sup>, William T. Harvey<sup>2</sup>, Philip C. Dishuck<sup>2</sup>, Evan E. Eichler<sup>2,3</sup>, Giuliana Giannuzzi<sup>1</sup>

1. Department of Biosciences, University of Milan, Milan, Italy
2. Department of Genome Sciences, University of Washington School of Medicine, Seattle, WA, USA
3. Howard Hughes Medical Institute, University of Washington, Seattle, WA, USA
4. These authors contributed equally to this work.

Correspondence to:

Giuliana Giannuzzi

University of Milan

Department of Biosciences

Via Giovanni Celoria, 26

20133 Milano, Italy

[giuliana.giannuzzi@unimi.it](mailto:giuliana.giannuzzi@unimi.it)

This file contains Supplemental Figures S1-S7.

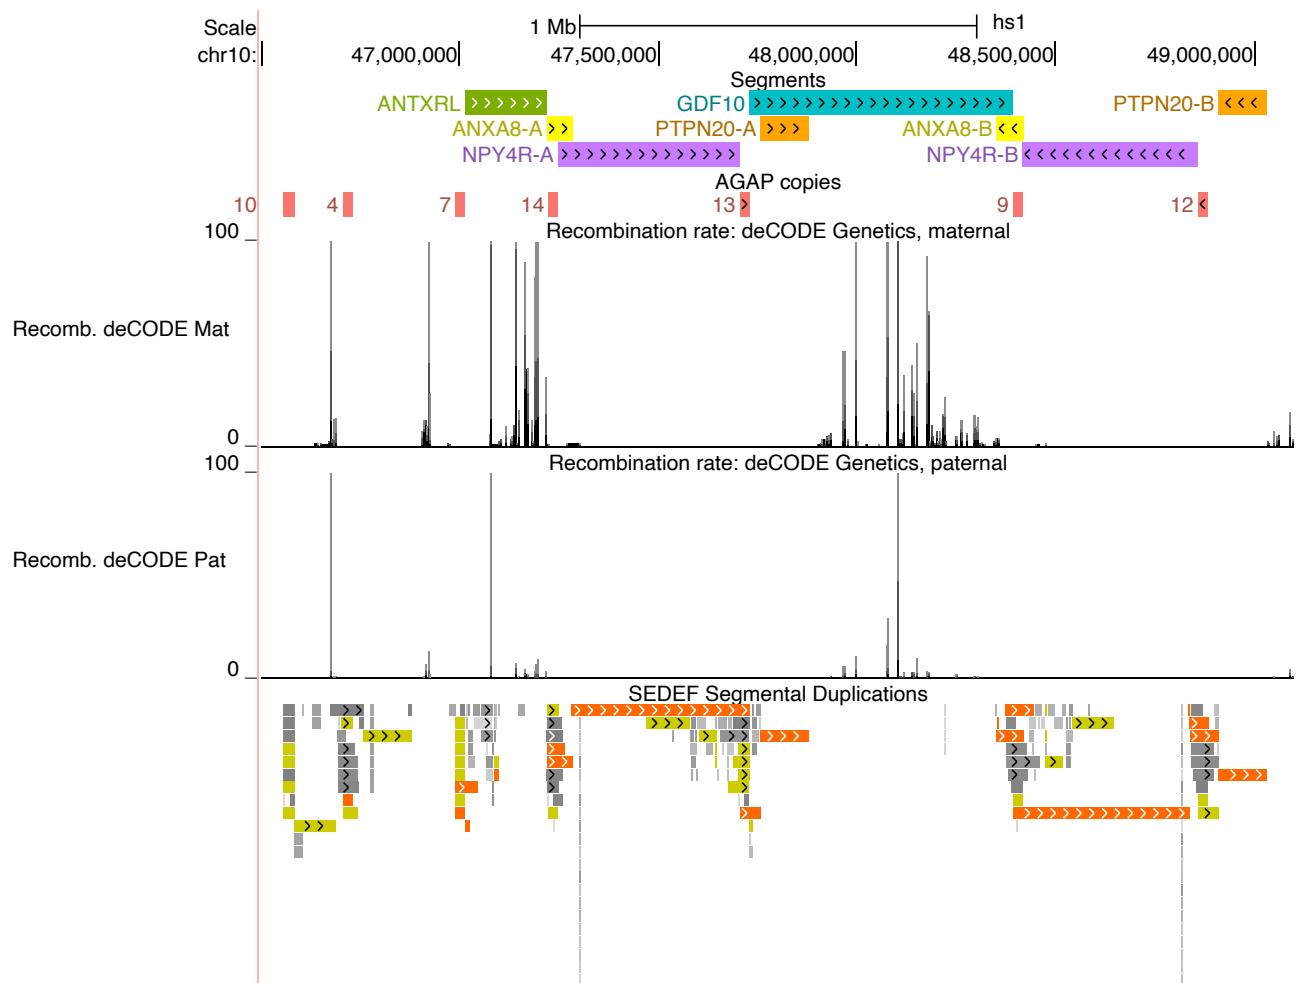

**Supplemental Figure S1. Recombination hotspots at chromosome 10q11.22.**

View in the UCSC Genome Browser on human T2T-CHM13 v2.0 of the region chr10:46,500,000-49,100,000. Segments track: the locations of the NPY4R-A and NPY4R-B inverted duplications (violet), ANTXRL segment (green), GDF10 segment (blue), ANXA8-A and ANXA8-B inverted duplications (yellow), and PTPN20-A and PTPN20-B inverted duplications (orange). The locations of *AGAP* copies are shown with red boxes, including both protein-coding genes and pseudogenes; maternal and paternal recombination rates from deCODE Genetics are shown; at the bottom, segmental duplication annotation is shown with colors reflecting the level of similarity: light to dark gray for 90-98%; yellow for 98-99%; orange for similarity greater than 99% (Numanagic et al. 2018; Vollger et al. 2022).

**A**

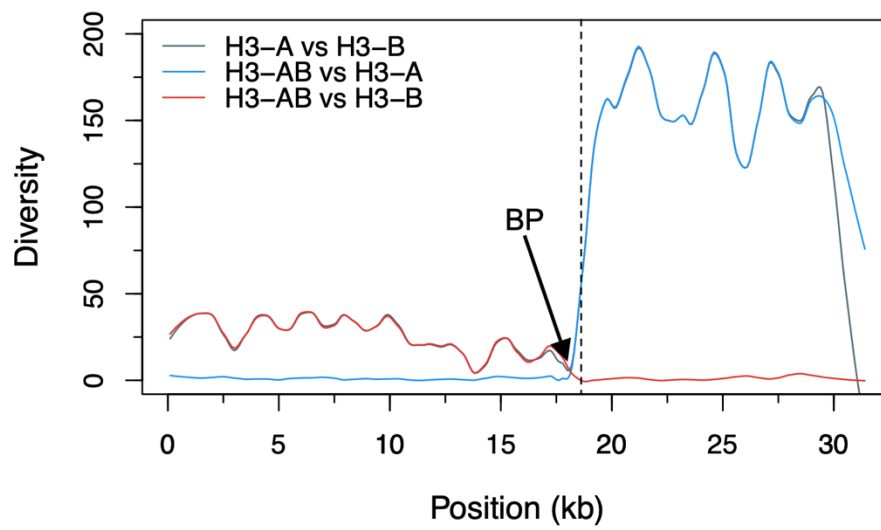

**B**

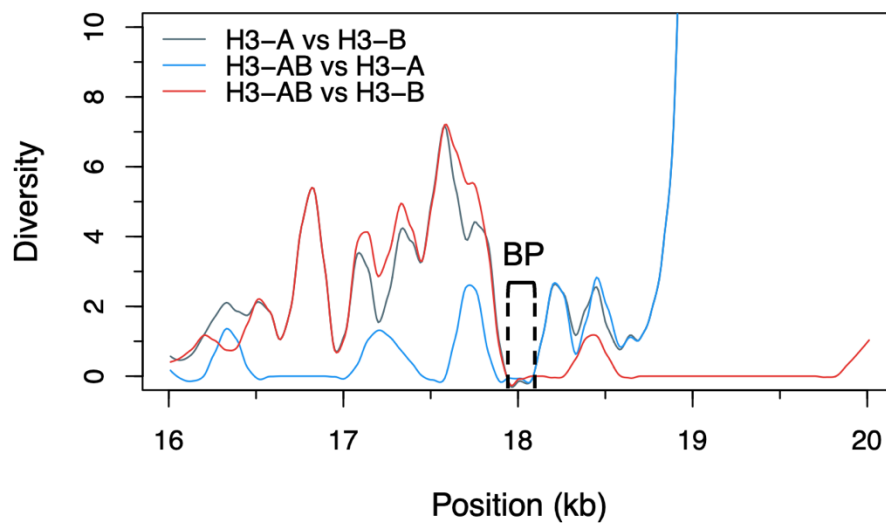

**C**

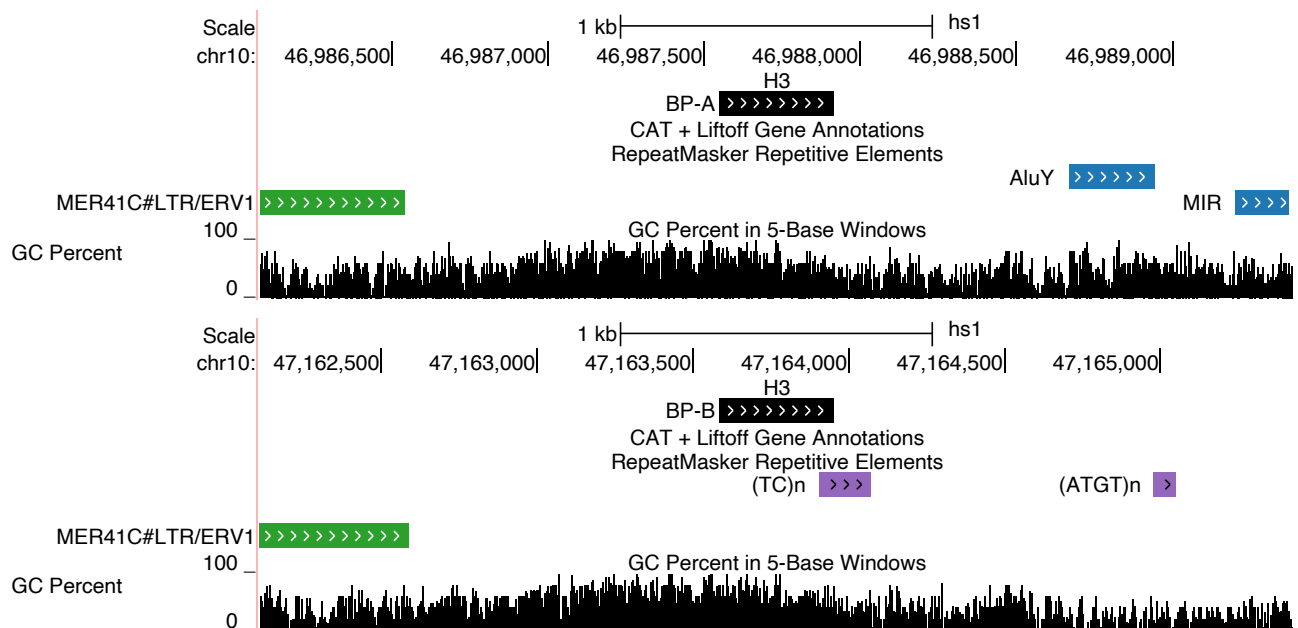

## **Supplemental Figure S2. H3 breakpoint analysis.**

**A)** Diversity plots of H3 breakpoint region compared with the putative SDs mediating the deletion. Here, as the breakpoint occurs towards the end of the SD blocks, the sequence was extended downstream. A horizontal dashed line marks the end of the segmental duplication alignment.

The plot shows the pairwise diversity in 500 bp sliding windows with 100 bp increment between the H3 breakpoint regions (H3-AB) and the original “A” (blue line) and “B” (red line) SDs. The gray line refers to the comparison between the parental SDs (H3-A versus H3-B), as a reference. The arrow indicates the location of the breakpoint as the point of switch in relative diversity between the blue and red lines.

**B)** Diversity plot of a region zoomed around the H3 breakpoint. The plot was obtained using the PopGenome R package, with width of 100 and jump of 10. H3-AB: sequence of H3 putative breakpoint region; H3-A and H3-B: sequences of segmental duplications that triggered the H3 rearrangement. The gray line refers to the comparison of H3-A versus H3-B, as a reference; the blue line refers to the comparison of H3-AB versus H3-A; the red line refers to the comparison of H3-AB versus H3-B. The restricted breakpoint interval of 369 bp is marked by dotted lines.

**C)** View in UCSC Genome Browser on human T2T-CHM13 v2.0 of gene annotation, repetitive elements, and GC content at the H3 breakpoints in the proximal and distal SD copies triggering the rearrangement.

**A**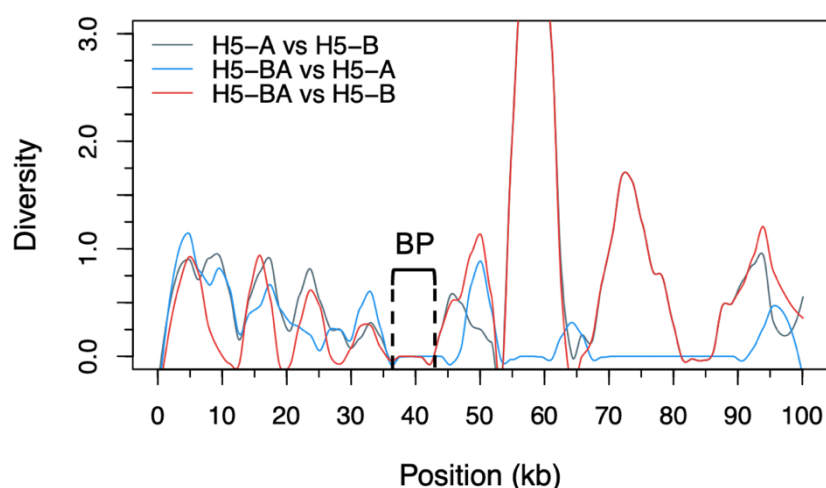**B**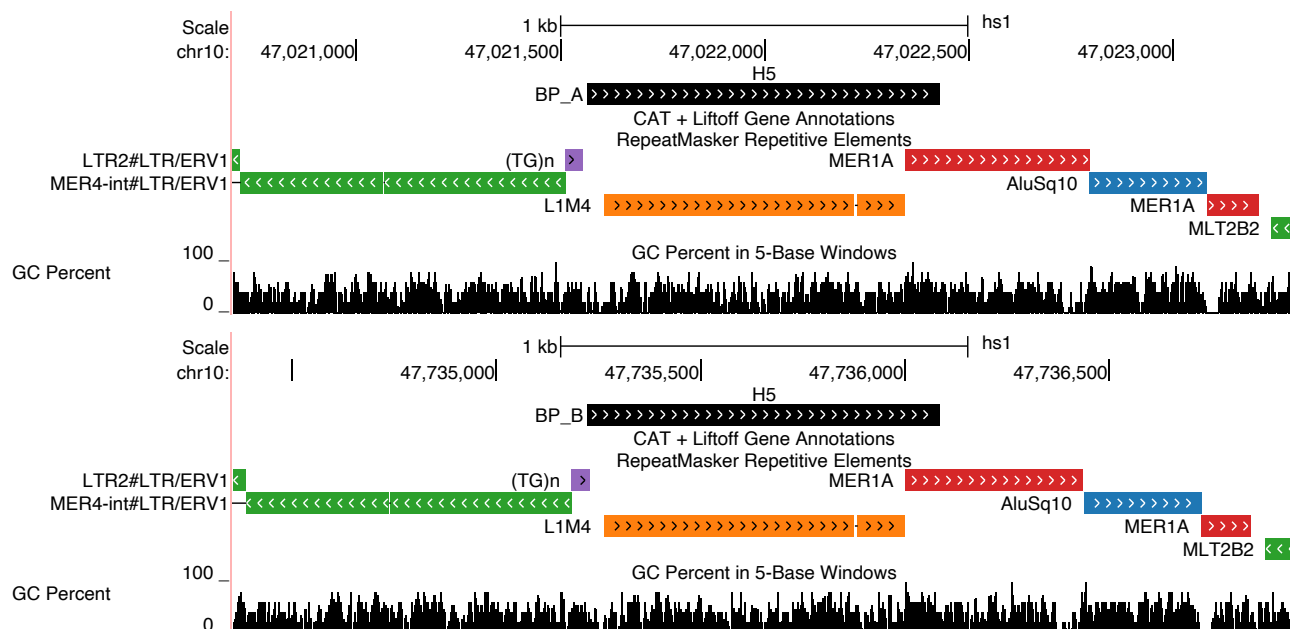

### Supplemental Figure S3. H5 breakpoint analysis.

**A)** Diversity plot of a region zoomed around the H5 breakpoint. The plot was obtained using the PopGenome R package, with width of 100 and jump of 10. H5-AB: sequence of H5 putative breakpoint region; H5-A and H5-B: sequences of segmental duplications that triggered the H5 rearrangement. The gray line refers to the comparison of H5-A versus H5-B, as a reference; the blue line refers to the comparison of H5-AB versus H5-A; the red line refers to the comparison of H5-AB versus H5-B. The restricted breakpoint interval of 867 bp is marked by dotted lines.

**B)** View in UCSC Genome Browser on human T2T-CHM13 v2.0 of gene annotation, repetitive elements, and GC content at the H5 breakpoints in the proximal and distal SD copies triggering the rearrangement.

**A**

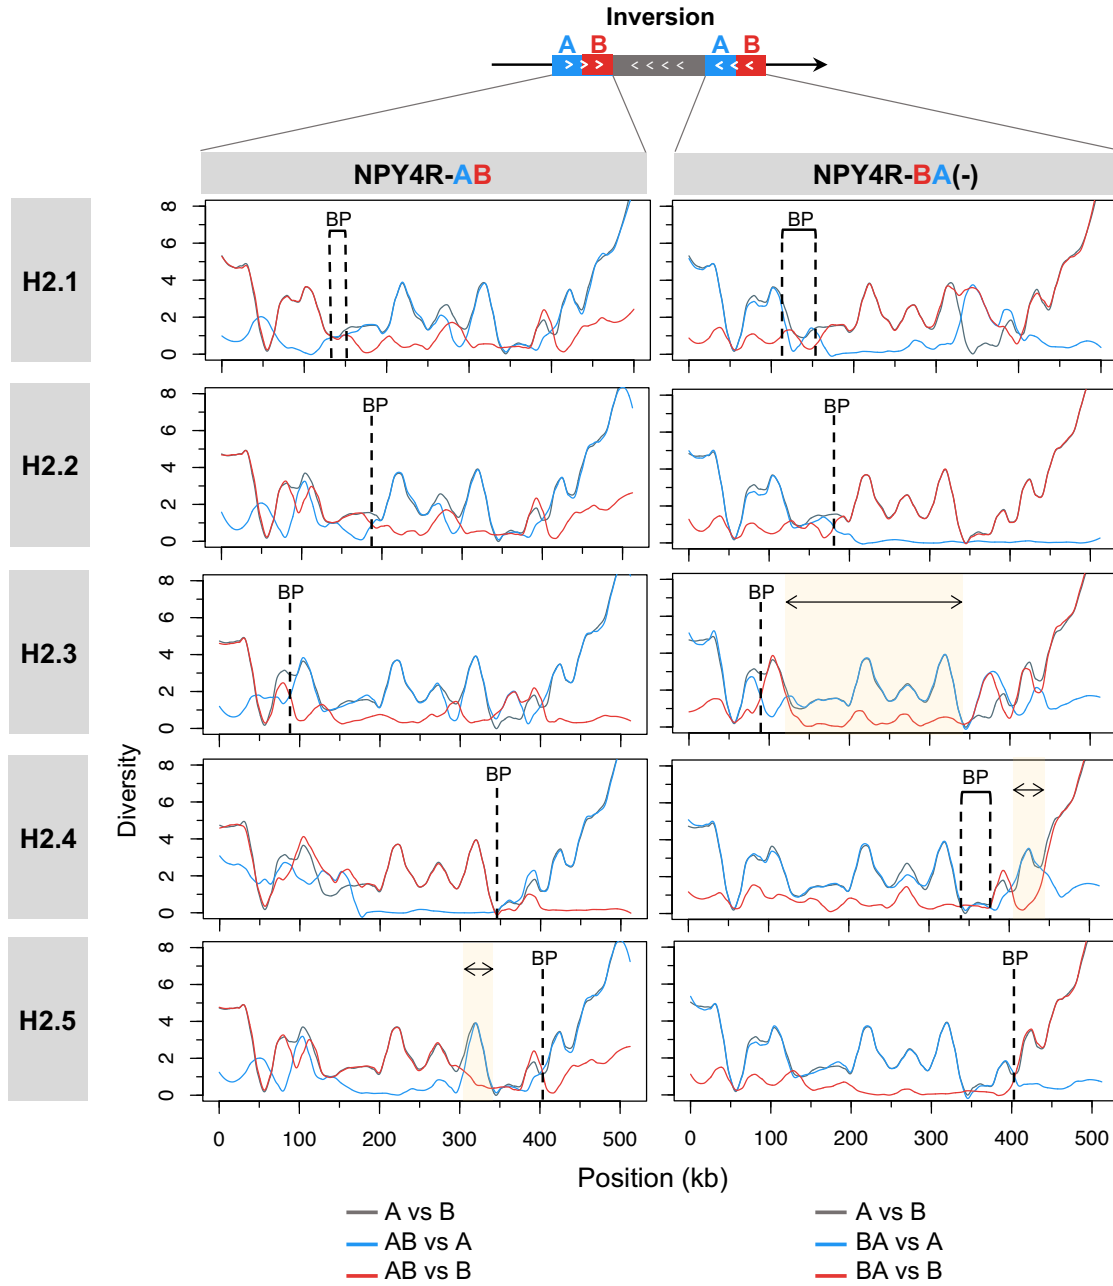

**B**

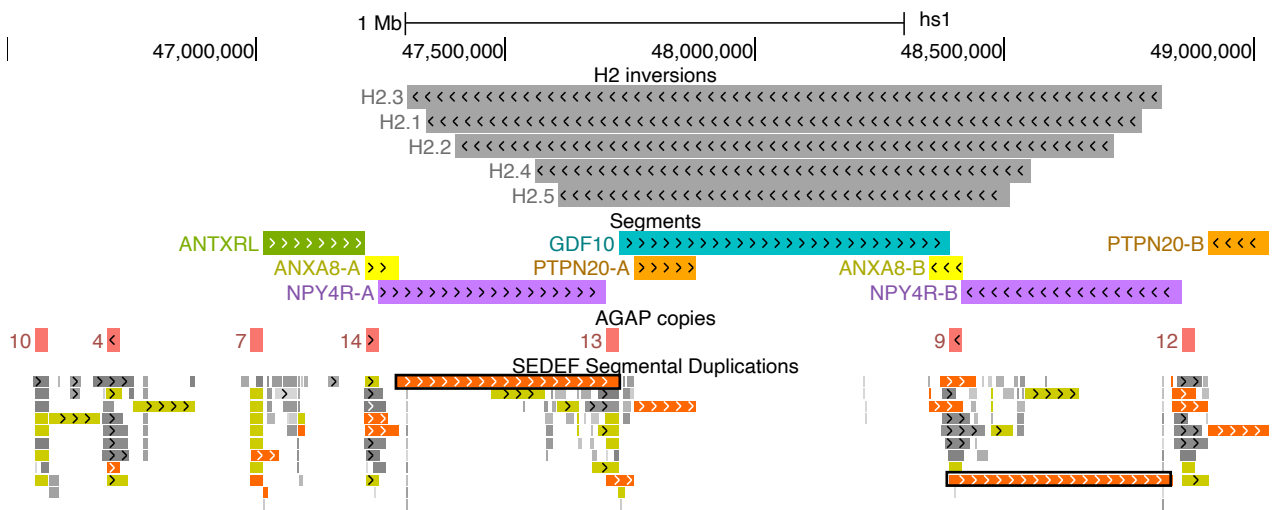

**Supplemental Figure S4. Breakpoint definition in five haploid genomes showing the H2 haplotype.**

**A)** Diversity plots of the H2 NPY4R-AB duplicon (*left*) or H2 NPY4R-BA duplicon, reverse strand (*right*) compared with the H1 NPY4R-A (blue line) or NPY4R-B (red line) duplicons. The grey line refers to the comparison between H1 NPY4R-A and NPY4R-B, as a reference. Dotted lines designate the breakpoint region that is consistent between AB and BA plots. Segments where the similarity is unexpectedly higher to the other SD copy are highlighted in yellow.

**B)** View in the UCSC Genome Browser of inversion segments in H2 haplotypes. The region shown is chr10:46,500,000-49,100,000 (T2T-CHM13 v2.0). Black squares in the SEDEF Segmental Duplications track indicate the SD pair generating the inversions.

A

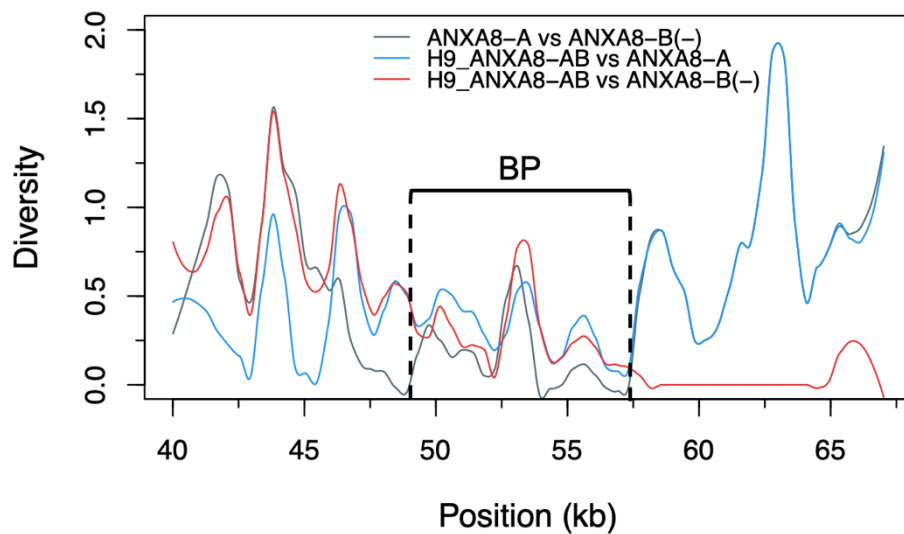

B

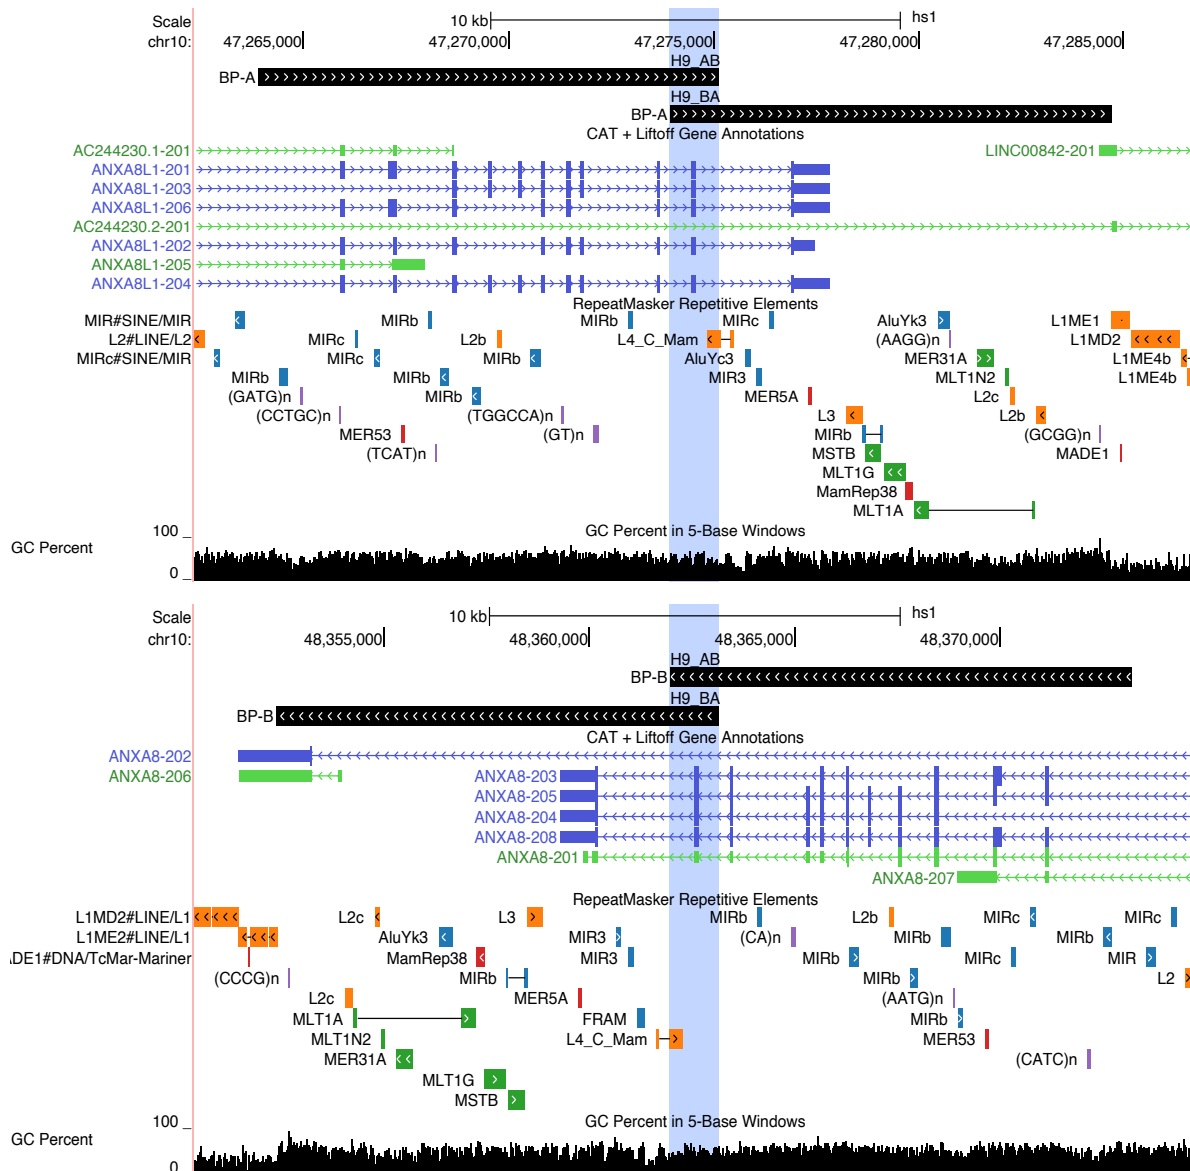



### **Supplemental Figure S5. H9 breakpoint analysis.**

**A)** Diversity plot of a region zoomed around the H9 breakpoint. The plot was obtained using the PopGenome R package, with width of 100 and jump of 10. H9\_ANXA8-AB: sequence of H9 breakpoint region; ANXA8-A and ANXA8-B(-): sequences of segmental duplications that triggered the H9 rearrangement. The gray line refers to the comparison of ANXA8-A versus ANXA8-B(-), as a reference; the blue line refers to the comparison of H9\_ANXA8-AB versus ANXA8-A; the red line refers to the comparison of H9\_ANXA8-AB versus ANXA8-B(-). The breakpoint interval of 11.5 kb is marked by dotted lines.

**B)** View in UCSC Genome Browser on human T2T-CHM13 v2.0 of gene annotation, repetitive elements, and GC content at the H9 breakpoints in the proximal and distal SD copies triggering the rearrangement. The final identified breakpoint region, given by the intersection between AB and BA breakpoints, is highlighted in blue.

**A**

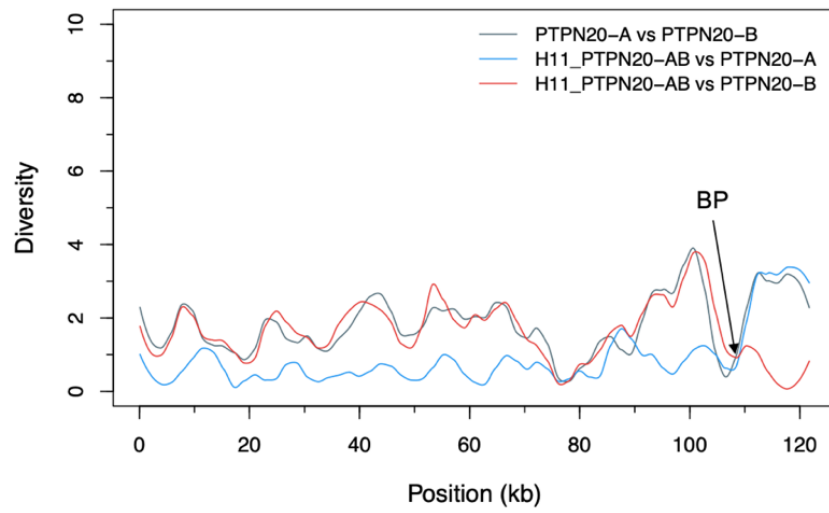

**B**

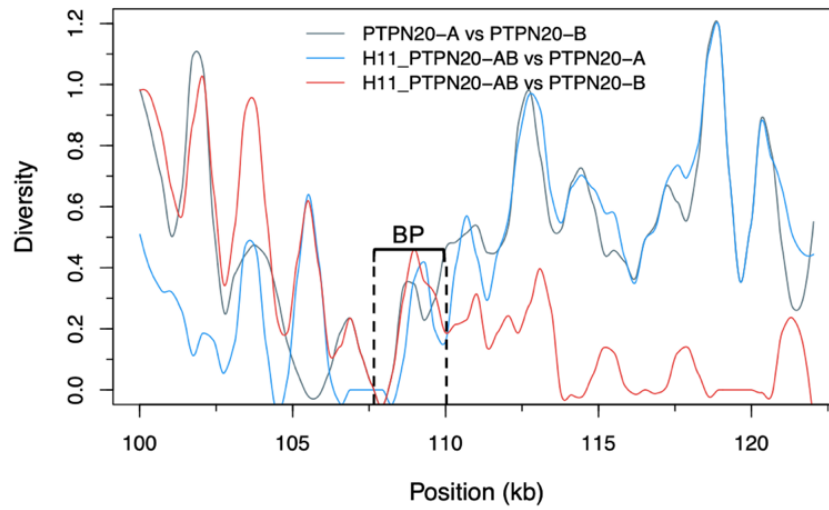

**C**

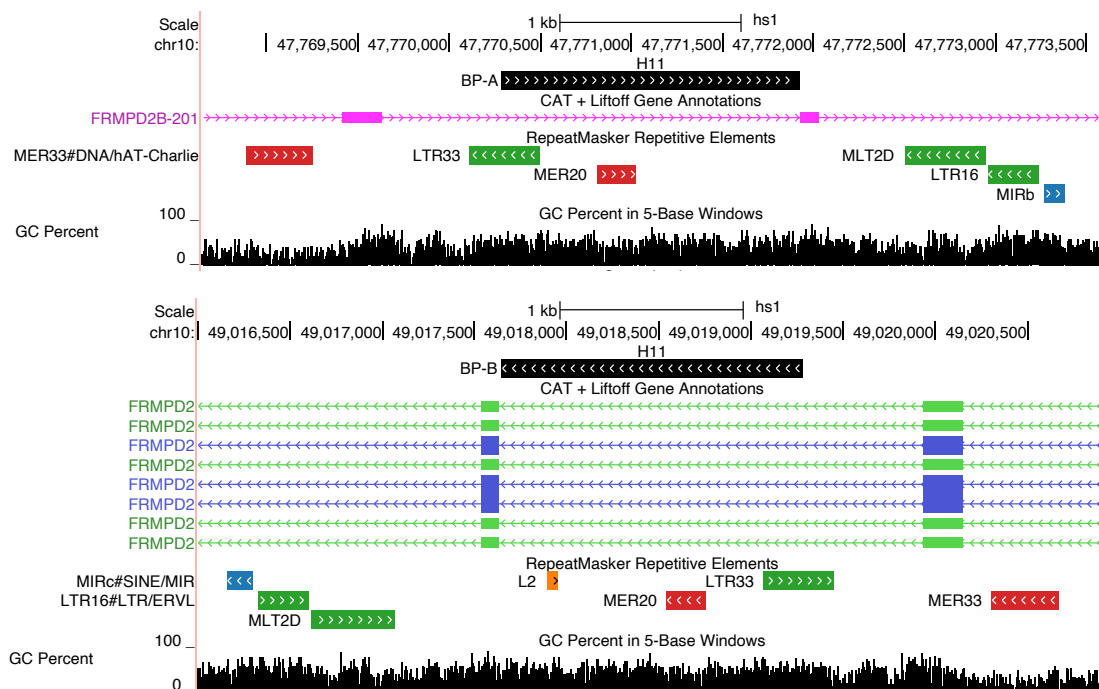

### **Supplemental Figure S6. H11 breakpoint analysis.**

**A)** Diversity plot of H11 putative breakpoint region. The plot was obtained using the PopGenome R package, with width of 500 and jump of 100. H11\_PTPN20-AB: sequence of H11 putative breakpoint region; PTPN20-A and PTPN20-B: sequences of segmental duplications that triggered the H11 rearrangement. The gray line refers to the comparison of PTPN20-A versus PTPN20-B, as a reference; the blue line refers to the comparison of H11\_PTPN20-AB versus PTPN20-A; the red line refers to the comparison of H11\_PTPN20-AB versus PTPN20-B. The breakpoint interval is marked by dotted lines.

**B)** Diversity plot of a region zoomed around the H11 breakpoint. The plot was obtained using the PopGenome R package, with width of 100 and jump of 10. H11\_PTPN20-AB: sequence of H11 putative breakpoint region; PTPN20-A and PTPN20-B: sequences of segmental duplications that triggered the H11 rearrangement. The gray line refers to the comparison of PTPN20-A versus PTPN20-B, as a reference; the blue line refers to the comparison of H11\_PTPN20-AB versus PTPN20-A; the red line refers to the comparison of H11\_PTPN20-AB versus PTPN20-B. The breakpoint interval of 1.6 kb is marked by dotted lines.

**C)** View in UCSC Genome Browser on human T2T-CHM13 v2.0 of gene annotation, repetitive elements, and GC content at the H11 breakpoints in the proximal and distal SD copies triggering the rearrangement.

A

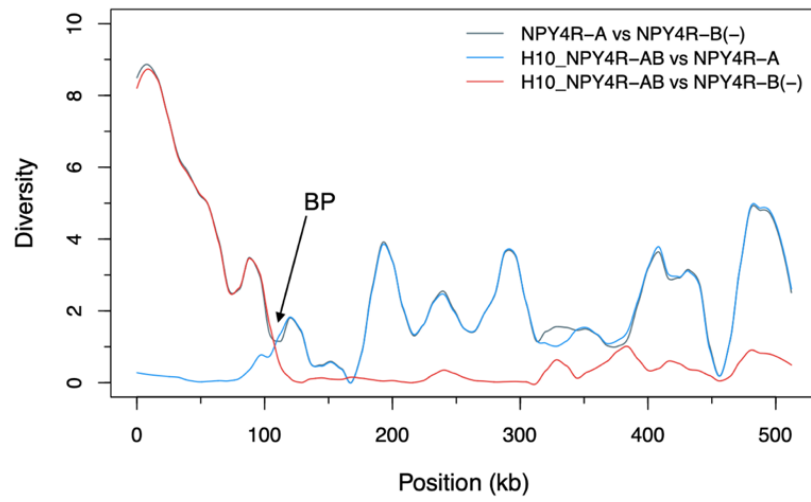

B

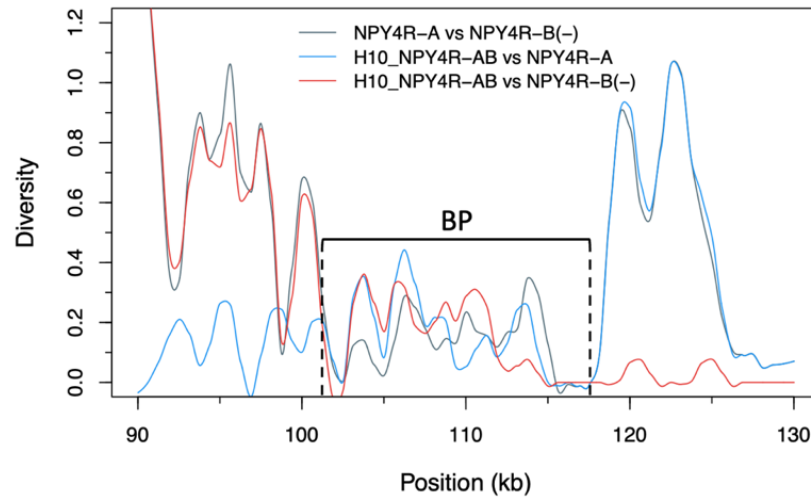

C

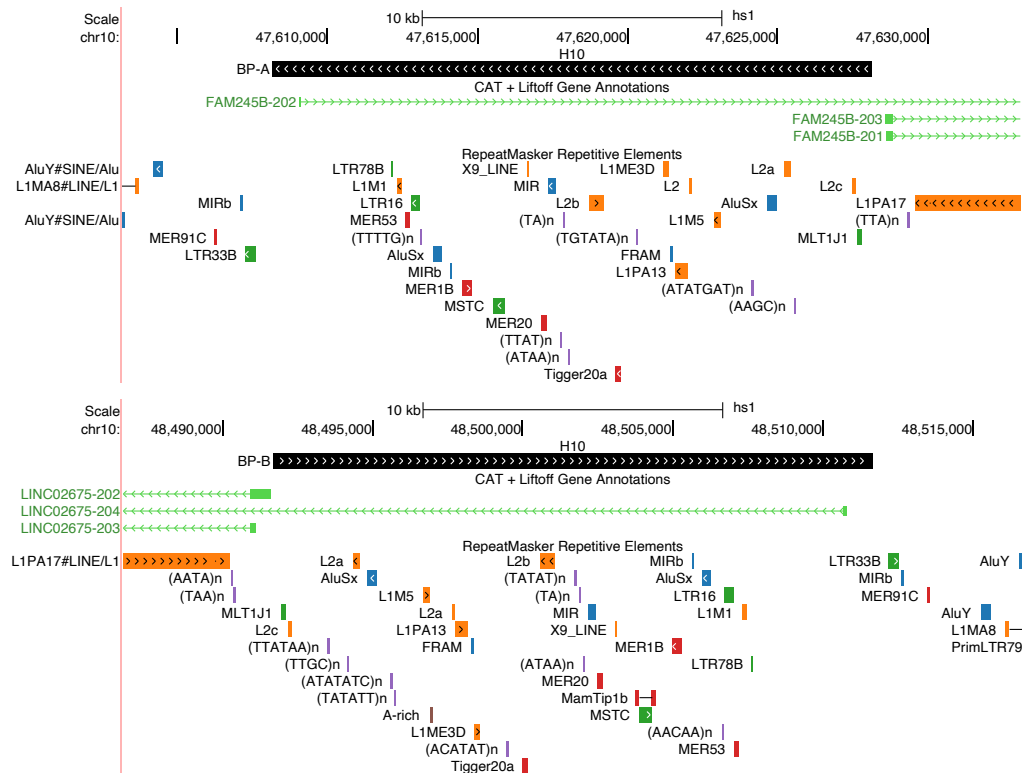

### **Supplemental Figure S7. H10 breakpoint analysis.**

**A)** Diversity plot of H10 putative breakpoint region. The plot was obtained using the PopGenome R package, with width of 500 and jump of 100. H10\_NPY4R-AB: sequence of H10 putative breakpoint region; NPY4R-A and NPY4R-B: sequences of segmental duplications that triggered the H10 rearrangement. The gray line refers to the comparison of NPY4R-A versus NPY4R-B, as a reference; the blue line refers to the comparison of H10\_NPY4R-AB versus NPY4R-A; the red line refers to the comparison of H10\_NPY4R-AB versus NPY4R-B. The breakpoint interval is marked by dotted lines.

**B)** Diversity plot of a region zoomed around the H10 breakpoint. This was obtained using the PopGenome R package, with width of 100 and jump of 10. H10\_NPY4R-AB: sequence of H10 putative breakpoint region; NPY4R-A and NPY4R-B: sequences of segmental duplications that triggered the H10 rearrangement. The gray line refers to the comparison of NPY4R-A versus NPY4R-B, as a reference; the blue line refers to the comparison of H10\_NPY4R-AB versus NPY4R-A; the red line refers to the comparison of H10\_NPY4R-AB versus NPY4R-B. The breakpoint interval of 20 kb is marked by dotted lines.

**C)** View in UCSC Genome Browser on human T2T-CHM13 v2.0 of gene annotation, repetitive elements, and GC content at the H10 breakpoints in the proximal and distal SD copies triggering the rearrangement.
